# Supplementary material
Source: publisher figshare collection journal article supplement (https://acs.figshare.com/ndownloader/files/18022553)
Supplement: Supplementary file 1 [file 18022553]

## Supporting Information

# Enhanced Performance of Electric Double Layer Micro-supercapacitor Based on Novel Carbon Encapsulated Cu Nanowire Network Structure as Electrode

*Jingyuan Wang,<sup>†,§</sup> Xinghui Wang,<sup>||\*</sup> Seok Woo Lee<sup>†\*</sup> and Qing Zhang<sup>†\*</sup>*

<sup>†</sup>NOVITAS, Nanoelectronics Centre of Excellence, School of Electrical and Electronic Engineering, Nanyang Technological University, Singapore 639798, Singapore.

<sup>§</sup>Wintech Nano-Technology Services Pte Ltd, Singapore 117684, Singapore.

<sup>||</sup>College of physics and Information Engineering, Institute of Micro-Nano Devices and Solar Cells, Fuzhou University, Fuzhou, 350108, P. R. China.

\*E-mail: [qqzhang@ntu.edu.sg](mailto:qqzhang@ntu.edu.sg) , Qing Zhang

[Seaphy23@fzu.edu.cn](mailto:Seaphy23@fzu.edu.cn), Xinghui Wang

[Sw.lee@ntu.edu.sg](mailto:Sw.lee@ntu.edu.sg), Seok Woo Lee

## Suppressing CuO Growth in Synthesis of Cu(OH)<sub>2</sub> Nanowires

Cu(OH)<sub>2</sub> and CuO nanostructures can be formed on Cu substrates via a surface oxidation process in an alkaline solution in the following equations:<sup>1</sup>

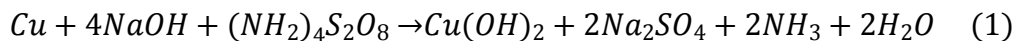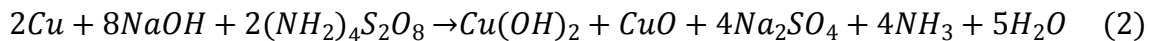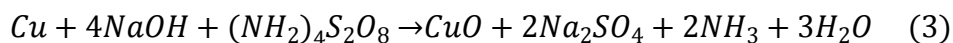

It is also proposed that in addition to forming CuO directly from Cu, Cu(OH)<sub>2</sub> can also undergo reaction in an alkaline environment to form CuO according to the two-step reaction below<sup>2</sup>

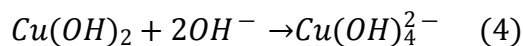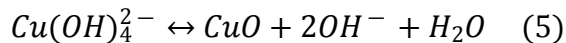

Although Cu(OH)<sub>2</sub> is fairly stable in water with a solubility of  $1.3 \times 10^{-5}$  mol L<sup>-1</sup>, it dissolves much quicker in the alkaline solution of a solubility of  $6 \times 10^{-2}$  mol L<sup>-1</sup>, forming Cu(OH)<sub>4</sub><sup>2-</sup> ions<sup>3-4</sup> according to eqn. (4). A condensation process follows (eqn. (5)) and CuO particles are formed. Hence, in order to inhibit the formation of CuO particles, growth of Cu(OH)<sub>2</sub> nanowires (eqn (3)) has to be much faster than formation of CuO particles (eqn (4) and (5)). For this purpose, a 10 times less concentrated reaction solution was prepared to reduce the alkalinity while keeping the ratio of [APS]/[NaOH] the same<sup>2</sup>. As a result, almost no CuO nanoparticles were formed. CuO particles are clearly visible as illustrated in Fig. S1a and Fig. S1b when a one-step concentrated reactant solution was used.

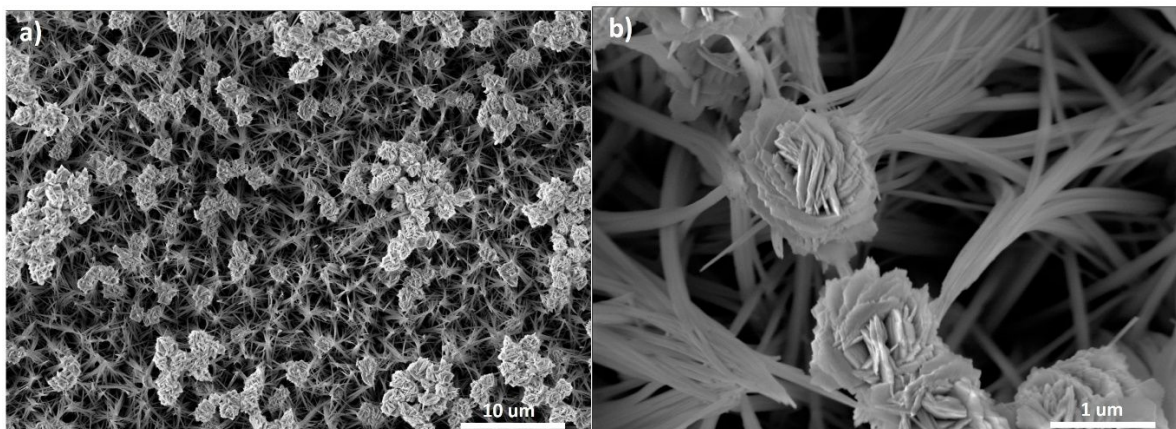

**Figure S1.** (a) SEM images of  $\text{Cu}(\text{OH})_2$  nanowires with  $\text{CuO}$  nanoparticles and (b) and high magnification view of  $\text{CuO}$  nanoparticles.

#### **XPS analysis on Cu nanowire network**

Figure S2 shows the Cu 2p XPS spectrum of the Cu nanowires. The peak at 932.5 eV can be attributed to Cu 2p<sub>3/2</sub> of Cu phase while the smaller peak at 952.3 eV results from Cu 2p<sub>1/2</sub> of Cu.<sup>5</sup> The absence of strong Cu<sup>2+</sup> satellite peaks at ~943 eV region suggests the sample did not contain CuO phase.<sup>5</sup> In addition, Cu LMM spectrum is useful in distinguishing between Cu<sub>2</sub>O and Cu. As Cu is expected to have a binding energy between 567.7 – 567.9 eV, while Cu<sub>2</sub>O should have a peak at about 570 eV.<sup>6</sup> A peak at 568.1 eV in the LMM spectrum (Figure 3b) suggests that Cu<sub>2</sub>O is not present.

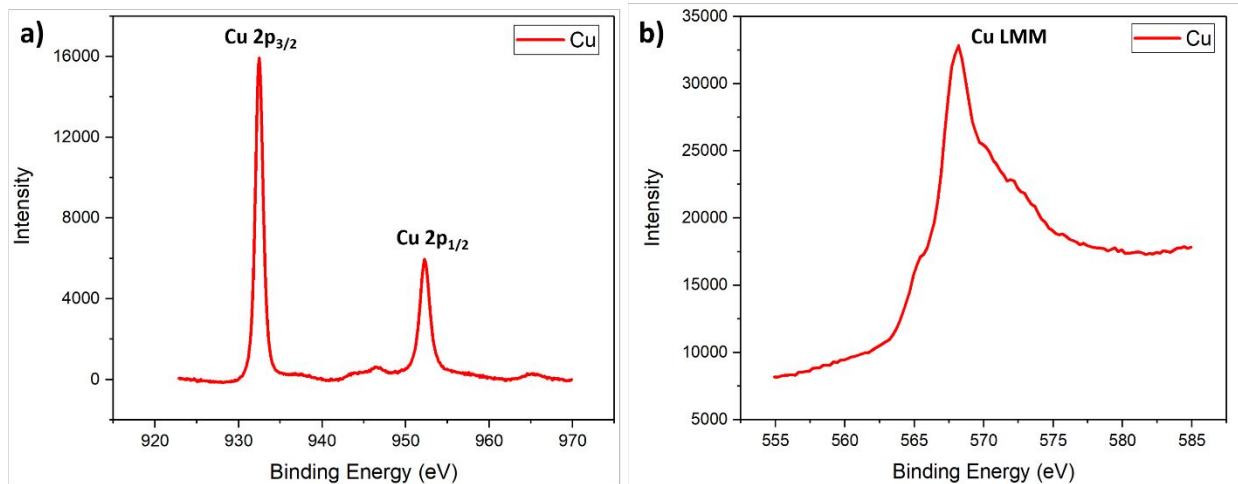

**Figure S2.** (a) XPS spectra at Cu2p binding energy and (b) Cu LMM binding energy of Cu nanowires after thermal reduction of Cu(OH)<sub>2</sub> at 300 oC in H<sub>2</sub> environment for 1 hr.

### SEM-EDX of 300°C grown carbon

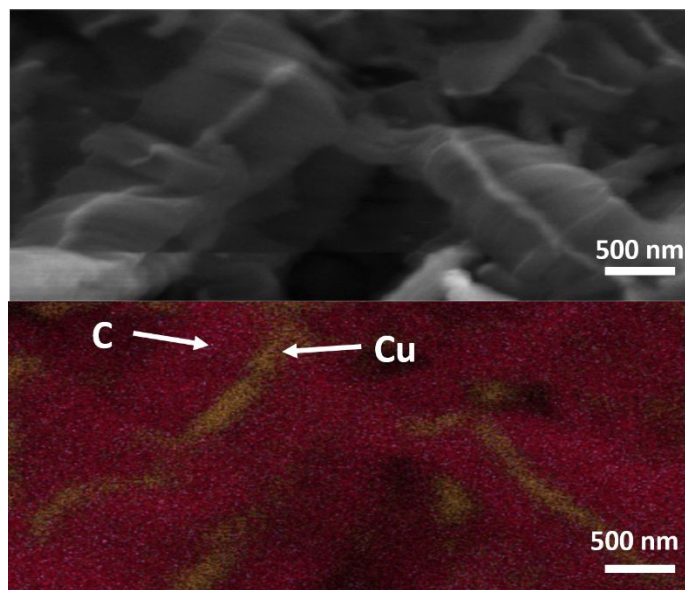

**Figure S3.** SEM-EDX elemental mapping of Carbon grown at 300oC shows the growth of carbon to be perpendicular to a single Cu nanowire in opposite direction in a fin shaped structure.

### **C/Cu Electrode EDX Mapping**

SEM-EDX analysis was done on the carbon grown copper nanowire network electrode. EDX mapping was done on the selected area in the SEM image (Fig. S4a) to observe for the distribution of the grown carbon. From Fig. S4b, carbon can be clearly observed to be grown on Cu nanowire network. Fig 43c shows the Cu nanowire network.

The elements present were quantified with the EDX as shown in the spectrum in Fig. S4. Observed elements were mostly Cu (77.7 weight%) and C (20.2 weight%) with only trace amount of O (1.6 weight%) and Si (0.6 weight%).

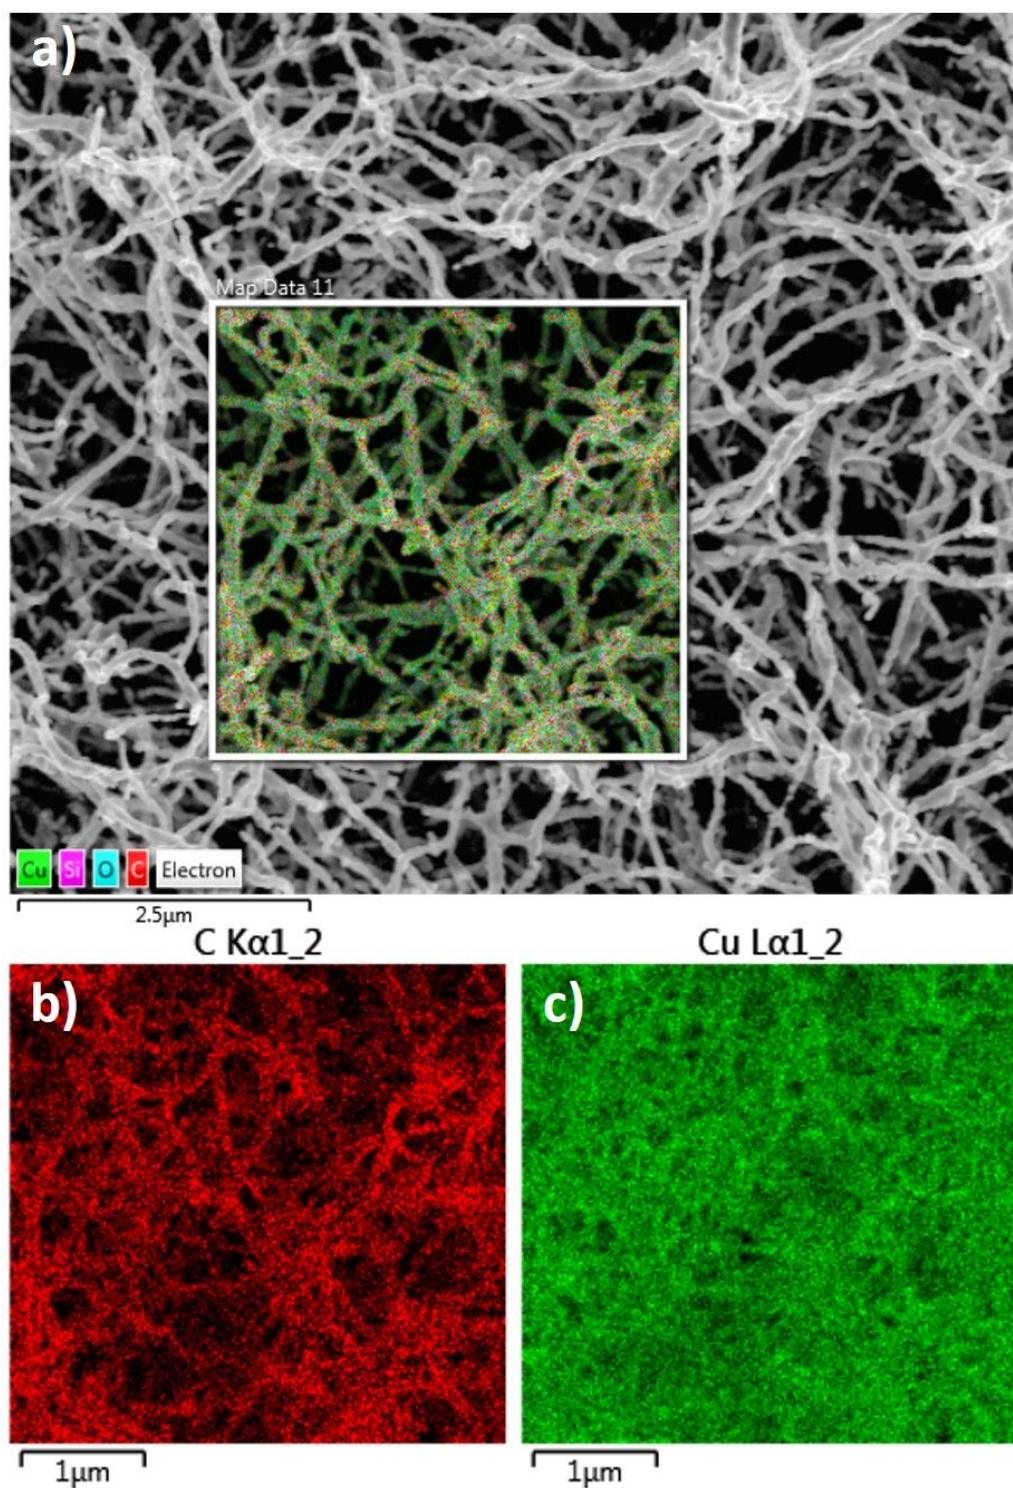

**Figure S4.** (a) SEM and EDX mapping image overlay of carbon grown on Cu at 600 °C, (b) elemental distribution map of C, and (c) Cu.



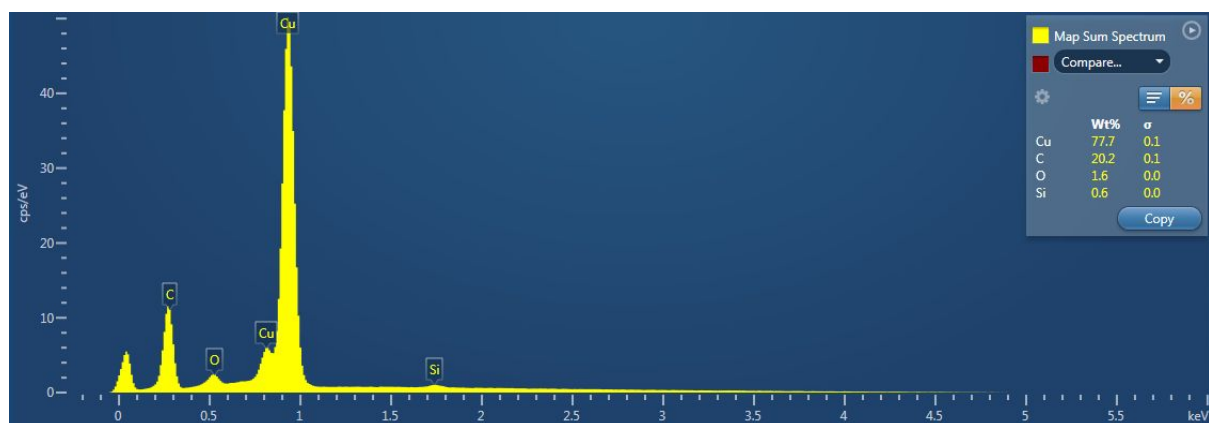

**Figure S5.** EDX mapping spectrum of carbon grown on Cu at 600 °C shows 20 wt% C.

### GCD curve of 300°C sample

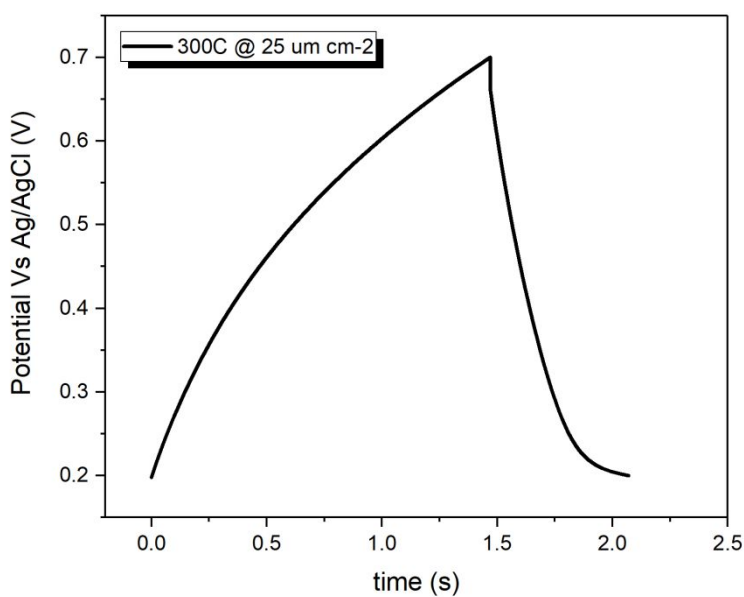

**Figure S6.** GCD curve of 300°C sample with readjusted voltage window of 0.2 – 0.7 V.

Figure S6 shows the GCD result of 300°C sample with readjusted voltage window that was attainable at 25  $\mu\text{A cm}^{-2}$ . Despite the small current density, the maximum set voltage is reached in just 1.5s, while the discharging curve is highly unsymmetrical which discharges in about 0.5s.

## REFERENCES

1. Liu, Y.; Qiao, Y.; Zhang, W.; Hu, P.; Chen, C.; Li, Z.; Yuan, L.; Hu, X.; Huang, Y., Facile Fabrication of CuO Nanosheets on Cu Substrate as Anode Aaterials for Electrochemical Energy Storage. *Journal of Alloys and Compound* **2014**, *586*, 208-215.
2. Schlur, L.; Bonnot, K.; Spitzer, D., Synthesis of Cu(OH)<sub>2</sub> and CuO Nanotubes Arrays on a Silicon wafer. *RSC Advances* **2015**, *5*, 6061-6070.
3. Singh, D. P.; Ojha, A. K.; Srivastava, O. N., Synthesis of Different Cu(OH)<sub>2</sub> and CuO (Nanowires, Rectangles, Seed-, Belt-, and Sheetlike) Nanostructures by Simple Wet Chemical Route. *The Journal of Physical Chemistry C* **2009**, *133* (9), 3409-3418.
4. Lu, C.; Qi, L.; Yang, J.; Zhang, D.; Wu, N.; Ma, J., Simple Template-Free Solution Route for the Controlled Synthesis of Cu(OH)<sub>2</sub> and CuO Nanostructures. *Journal of Physical Chemistry B* **2004**, *108* (46), 17825–17831.
5. Moulder, J. F.; Stickle, W. F.; Sobol, P. E.; Domben, K. D., Handbook of X-ray Photoelectron Spectroscopy. Perkin-Elmer Corporation: Minnesota, 1992; pp 86 - 87.
6. Ding, S.; Xie, Q.; Mueller, S.; Waechtler, T.; Lu, H.; Schulz, S. E.; Detavernier, C.; Qu, X.; Gessner, T., The Inhibition of Enhanced Cu Oxidation on Ruthenium/Diffusion Barrier Layers for Cu Interconnects by Carbon Alloying into Ru. *Journal of The Electrochemical Society* **2011**, *158* (12), H1228-H1232.
